# Supplementary material for: Graphene-wrapped pine needle-like cobalt nanocrystals constructed by cobalt nanorods for efficient microwave absorption performance
Source: Royal Society of Chemistry journal article supplement (doi:10.1039/d1ra06050c), 2021-01-01
Supplement: d1ra06050c1.pdf [file d1ra06050c1.pdf]

## Supporting Information

### Graphene-wrapped pine needle-like cobalt nanocrystals constructed by cobalt nanorods for efficient microwave absorption performance

Shu-Qing Lv<sup>a#</sup>, Peng-Zhao Han<sup>b#</sup>, Xiao-Juan Zhang<sup>c\*</sup> and Guang-Sheng Wang<sup>b\*</sup>

<sup>a</sup>*School of Civil Engineering and Architecture, Northeast Electric Power University, Jilin 132012*

<sup>b</sup>*School of Chemistry, Beihang University, Beijing 1000191, PR China, E-mail addresses: wanggsh@buaa.edu.cn*

<sup>c</sup>*College of Chemistry and Materials Engineering, Beijing Technology and Business University, Beijing 100048, PR China E-mail addresses: zhxiaojuan@btbu.edu.cn*

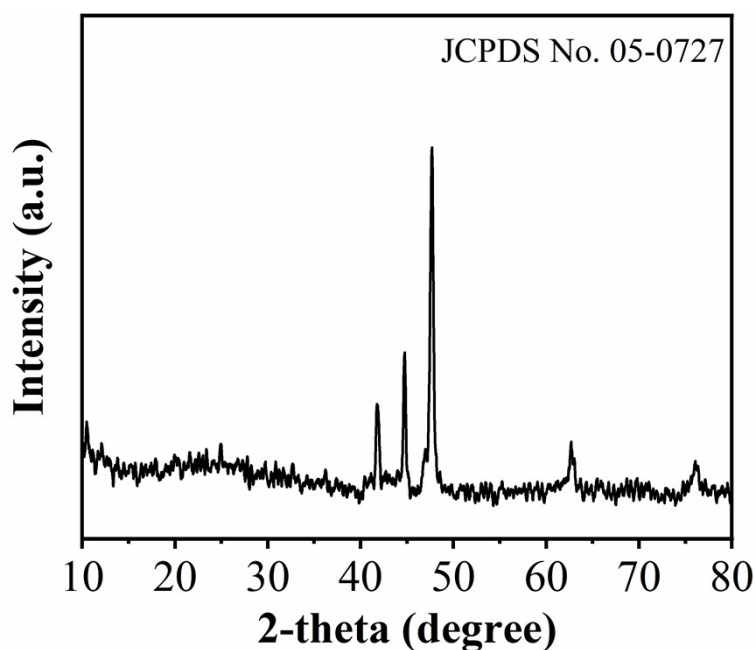

**Fig. S1.** The XRD pattern of Co nanocrystals.

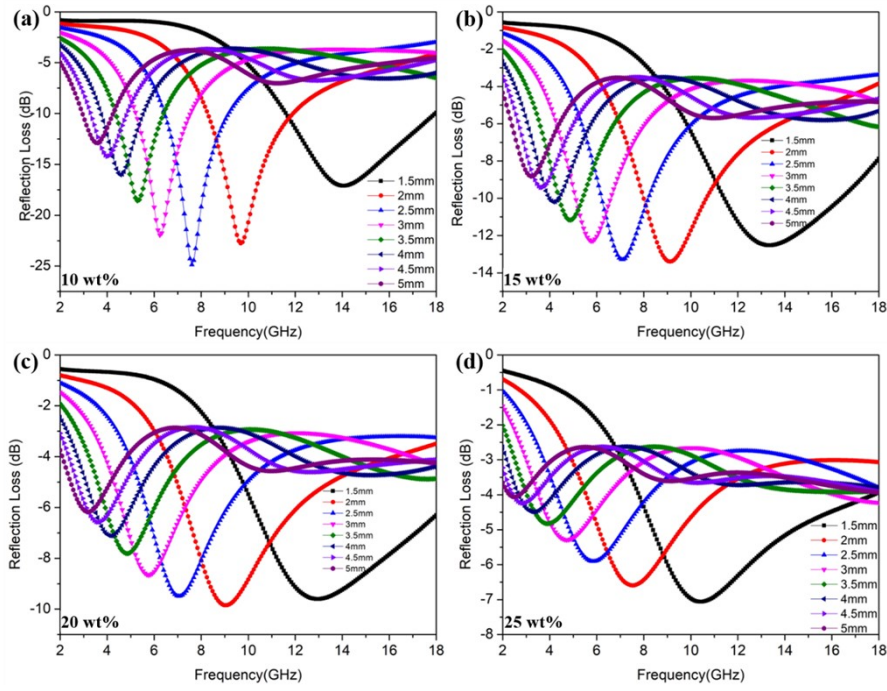

**Fig. S2.** The RL values for rGO/Co/PVDF composites (rGO/Co = 1:1) under different filler loadings: (a) 10 wt%; (b) 15 wt%; (c) 20 wt% and (d) 30 wt% within different thicknesses.

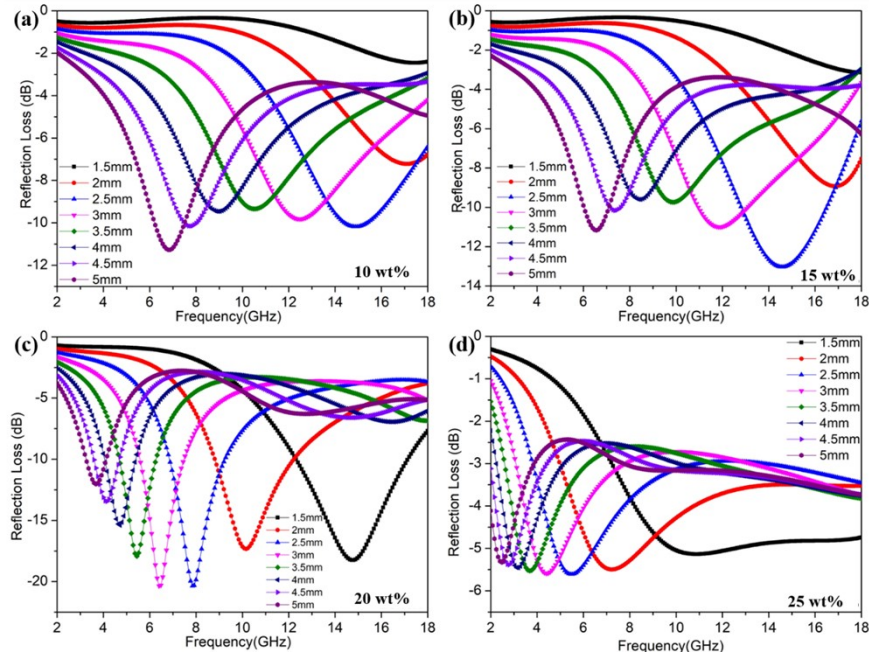

**Fig. S3.** The RL values for rGO/Co/PVDF composites (rGO/Co = 1:2) under different filler loadings: (a) 10 wt%; (b) 15 wt%; (c) 20 wt% and (d) 30 wt% within different thicknesses.

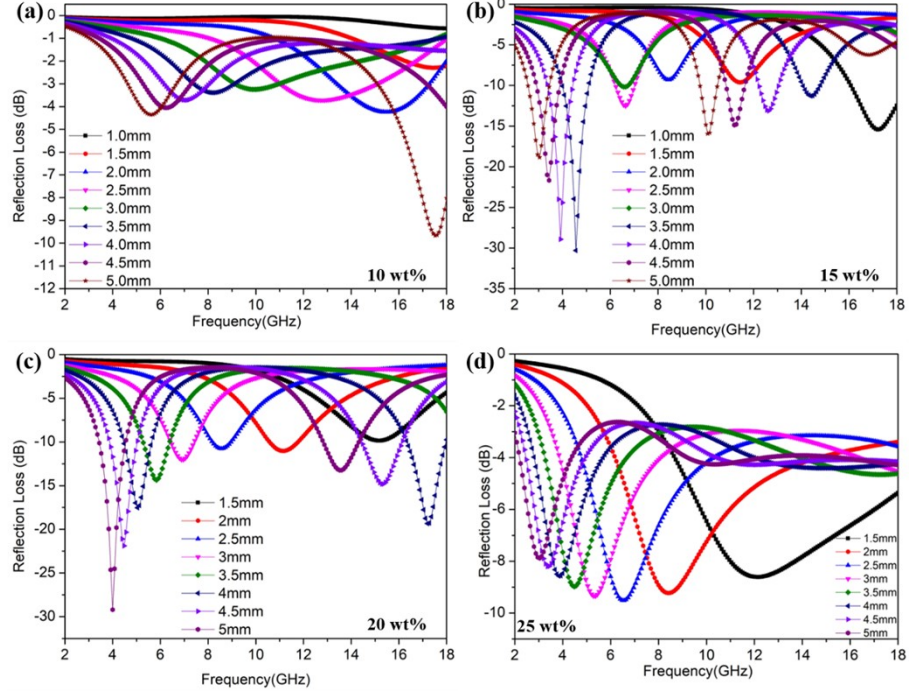

**Fig. S4.** The RL values for rGO/Co/PVDF composites (rGO/Co = 1:3) under different filler loadings: (a) 10 wt%; (b) 15 wt%; (c) 20 wt% and (d) 30 wt% within different thicknesses.

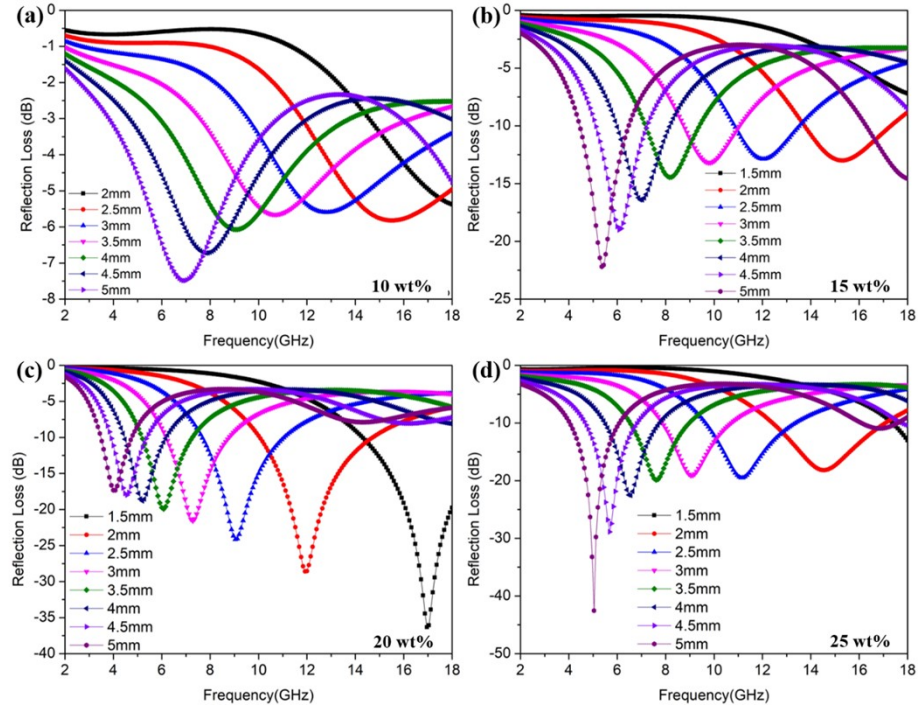

**Fig. S5.** The RL values for rGO/Co/PVDF composites (rGO/Co = 1:5) under different filler loadings: (a) 10 wt%; (b) 15 wt%; (c) 20 wt% and (d) 30 wt% within different thicknesses.

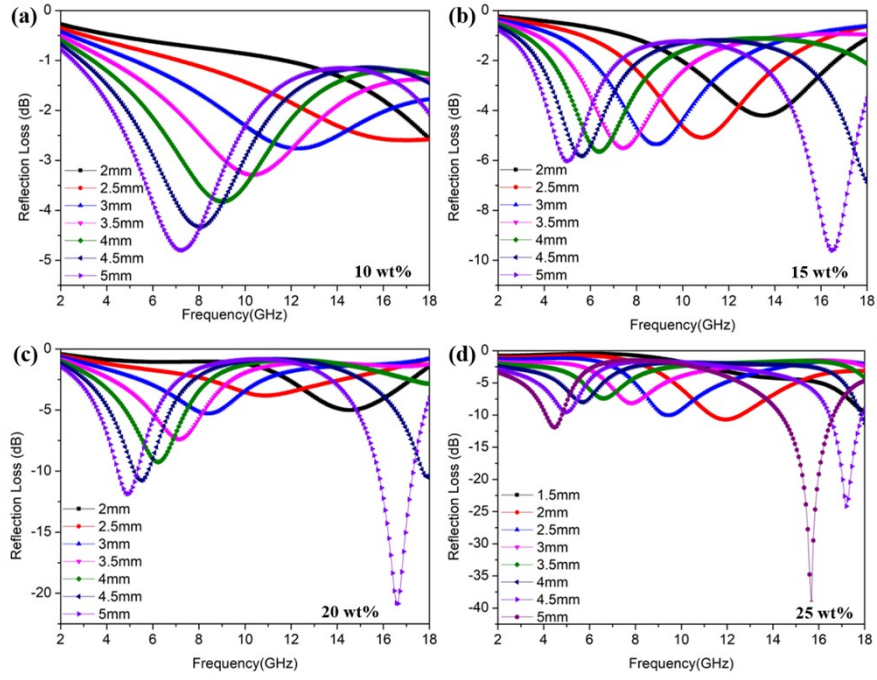

**Fig. S6.** The RL values for rGO/Co/PVDF composites (rGO/Co = 1:6) under different filler loadings: (a) 10 wt%; (b) 15 wt%; (c) 20 wt% and (d) 30 wt% within different thicknesses.

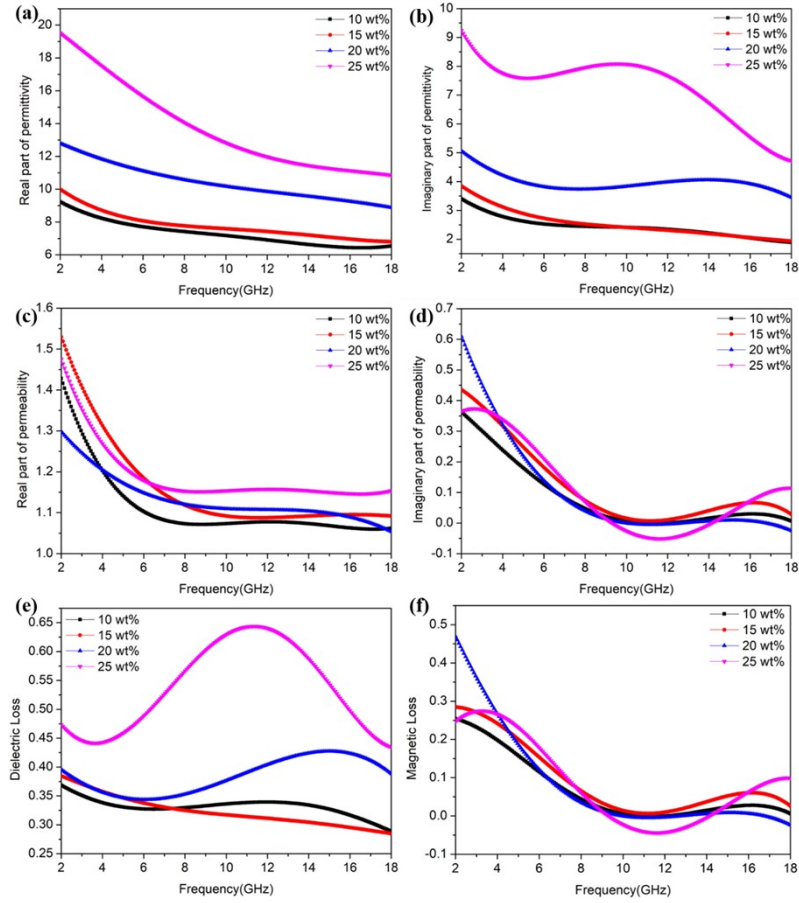

**Fig. S7.** (a) Real part and (b) imaginary part of permittivity, (c) real part and (d) imaginary part of permeability, (e) dielectric loss and (f) magnetic loss of



rGO/Co/PVDF composites (rGO/Co = 1:4) under different filler loadings.

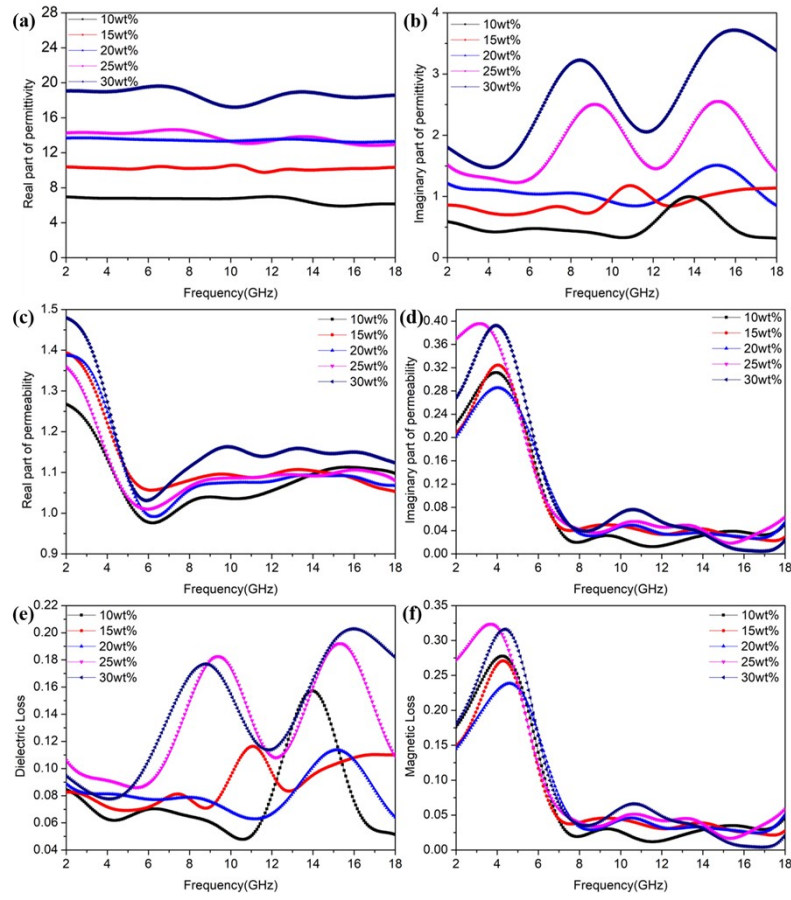

**Fig. S8.** (a) Real part and (b) imaginary part of permittivity, (c) real part and (d) imaginary part of permeability, (e) dielectric loss and (f) magnetic loss of Co/PVDF composites under different filler loadings.

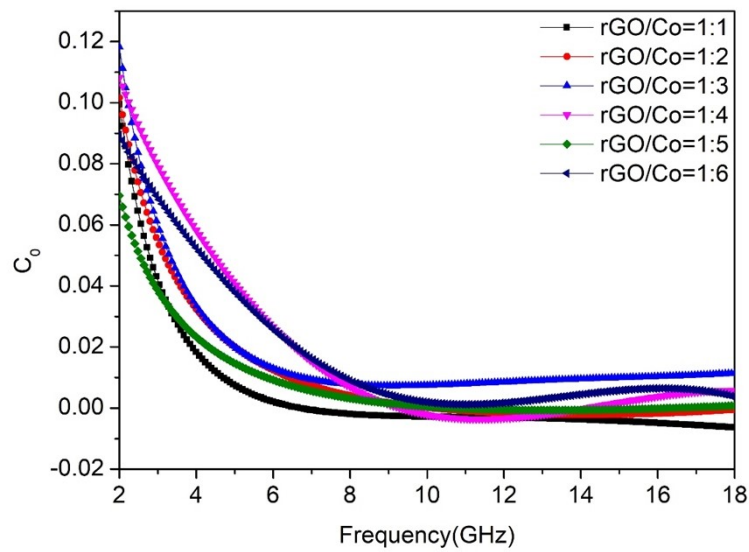

**Fig. S9.** The  $C_0$ - $f$  curves of rGO/Co/PVDF composites with different mass ratios of rGO/Co.
